# Voluntary Wheel Running Reverses Age-Induced Changes in Hippocampal Gene Expression

Rachel A. Kohman<sup>1\*</sup>, Sandra L. Rodriguez-Zas<sup>2</sup>, Bruce R. Southey<sup>2</sup>, Keith W. Kelley<sup>2,3</sup>, Robert Dantzer<sup>2,3</sup>, Justin S. Rhodes<sup>1</sup>

**1** Department of Psychology, Beckman Institute, University of Illinois, Urbana, Illinois, United States of America, **2** Department of Animal Sciences, University of Illinois at Urbana-Champaign, Urbana, Illinois, United States of America, **3** Integrated Immunology and Behavior Program, University of Illinois at Urbana-Champaign, Urbana, Illinois, United States of America

## Abstract

Normal aging alters expression of numerous genes within the brain. Some of these transcription changes likely contribute to age-associated cognitive decline, reduced neural plasticity, and the higher incidence of neuropathology. Identifying factors that modulate brain aging is crucial for improving quality of life. One promising intervention to counteract negative effects of aging is aerobic exercise. Aged subjects that exercise show enhanced cognitive performance and increased hippocampal neurogenesis and synaptic plasticity. Currently, the mechanisms behind the anti-aging effects of exercise are not understood. The present study conducted a microarray on whole hippocampal samples from adult (3.5-month-old) and aged (18-month-old) male BALB/c mice that were individually housed with or without running wheels for 8 weeks. Results showed that aging altered genes related to chromatin remodeling, cell growth, immune activity, and synapse organization compared to adult mice. Exercise was found to modulate many of the genes altered by aging, but in the opposite direction. For example, wheel running increased expression of genes related to cell growth and attenuated expression of genes involved in immune function and chromatin remodeling. Collectively, findings show that even late-onset exercise may attenuate age-related changes in gene expression and identifies possible pathways through which exercise may exert its beneficial effects.

**Citation:** Kohman RA, Rodriguez-Zas SL, Southey BR, Kelley KW, Dantzer R, et al. (2011) Voluntary Wheel Running Reverses Age-Induced Changes in Hippocampal Gene Expression. PLoS ONE 6(8): e22654. doi:10.1371/journal.pone.0022654

**Editor:** Thierry Amédée, Centre National de la Recherche Scientifique, University of Bordeaux, France

**Received:** May 23, 2011; **Accepted:** June 27, 2011; **Published:** August 8, 2011

**Copyright:** © 2011 Kohman et al. This is an open-access article distributed under the terms of the Creative Commons Attribution License, which permits unrestricted use, distribution, and reproduction in any medium, provided the original author and source are credited.

**Funding:** This work was supported by grants from the National Institutes of Health, MH083807 and DA027487, to JSR. The funders had no role in study design, data collection and analysis, decision to publish, or preparation of the manuscript.

**Competing Interests:** The authors have declared that no competing interests exist.

\* E-mail: rakohman@illinois.edu

## Introduction

Normal aging is associated with a decline in cognitive function, reduced neural plasticity, and is a primary risk factor for many neurodegenerative diseases including Alzheimer's disease [1–5]. As the number of individuals surviving into old age continues to increase, the need to identify the mediating factors of brain aging and potential treatments to slow or prevent its onset is crucial for ensuring healthy aging and reducing health care costs.

One area of the brain that is particularly vulnerable to age-related alterations is the hippocampus. Aging is associated with a decrease in hippocampal volume as well as functional deficits [1,2,6–8]. For example, aged animals consistently show impaired performance on hippocampus-dependent cognitive tasks including the water maze, contextual fear conditioning, and the radial arm maze [8–10]. Corresponding age-related impairments have been reported in several neurobiological correlates of learning and memory. For instance, aged mice show a reduction in both the production and survival of new neurons in the hippocampus [2,5,11]. Further, aged animals show an impaired ability to sustain long-term potentiation as well as reduced density of dendritic spines [3,12]. Analysis of hippocampal gene expression indicates that these age-related functional deficits may result from increased expression of genes related to oxidative stress and inflammation and decreased

expression of genes involved in mitochondrial function and neural plasticity [13,14]. Clearly, the hippocampus undergoes substantial age-related changes and is a candidate brain region to investigate mechanisms of brain aging.

Though aging is inevitable, the age-related decline in neural function is not. Lifestyle interventions, such as environmental enrichment, aerobic exercise, and caloric restriction, are reported to have preventative and possibly restorative effects in aged individuals [2,4,6,15,16]. Exercise is one potent intervention well known to enhance performance on a number of cognitive tasks in both humans and animals, including those that involve the hippocampus [2,6,17–19]. For example, van Praag et al. [2] reported that wheel running enhanced spatial learning in aged mice compared to sedentary mice. In addition to its cognitive benefits, exercise improves cardiovascular health and reduces the risk of several age-related pathologies, such as metabolic syndrome, diabetes, Alzheimer's and Parkinson's disease [20–22]. The cognitive and health benefits of exercise are associated with several physiological and anatomical changes, many of which take place in the hippocampus, such as increased production of growth factors, increased efficiency of the cerebral vascular system, enhanced hippocampal neurogenesis, and regulation of the immune and endocrine systems [23–27]. While these changes likely contribute, the precise mechanisms behind the anti-aging effects of exercise are not completely understood.

One approach to identify pathways that are altered by exercise in aged subjects is to assess changes in gene expression using microarray technology. A study by Stranahan et al. [28] evaluated hippocampal gene expression of aged mice that had lifelong access to running wheels compared to aged mice housed under sedentary conditions. They report that wheel running reduced expression of genes related to oxidative stress and apoptosis and increased expression of genes related to protein trafficking, glutamatergic neurotransmission, and the stress response. These data reveal that engaging in lifelong exercise may be protective in some respects. However, the ability of shorter periods of exercise, beginning late in life, to modulate global transcription has yet to be determined.

The present study evaluated age-related changes in hippocampal gene expression and assessed whether aerobic exercise differentially modulates gene expression in adult and aged mice. While prior reports have evaluated the impact of exercise on hippocampal gene expression in aged *or* adult subjects [28–30], the current study is unique in that it compares the effects of late onset exercise in both adult and aged mice. This approach is advantageous in that it allowed for identification of genes/networks of genes that are differentially regulated in adult and aged subjects in response to exercise as well as revealed age-induced changes in the hippocampus that are reversed by wheel running. Ultimately, these data have the potential to facilitate development of efficacious treatments that will help reduce the growing problem of age-related cognitive decline and neuropathologies.

## Methods

### 2.1. Experimental subjects

Subjects were 12 adult (3.5-month-old) and 8 aged (18-month-old) male BALB/c mice from an in-house aging colony. Mice were given *ad libitum* access to food and water and housed under a 12 hr light/dark cycle in the AAALAC approved Edward R. Madigan Laboratory Animal Facility. Prior to the start of the experiment mice were group housed (2–3 mice per cage), but during the experiment all mice were individually housed. Animals were treated in compliance with the *Guide for the Care and Use of Laboratory Animals* and the experiment was conducted in accordance with a protocol approved by the Institutional Animal Care and Use Committee (IACUC) at the University of Illinois at Urbana-Champaign (protocol number 09167 and Animal Welfare Assurance Number A3118-01).

### 2.2. Experimental design

Mice were divided by age into either the exercise (access to a running wheel) or sedentary condition, for a total of four treatment groups (adult exercise  $n=6$ , adult sedentary  $=6$ , aged exercise  $n=4$ , aged sedentary  $n=4$ ). Mice in the sedentary condition were individually housed in standard polypropylene shoebox cages (29 cm L×19 cm W×13 cm H). Mice in the exercise condition were individually housed in cages (36 cm L×20 cm W×14 cm H) with a 23 cm diameter running wheel (Respironics, Bend, OR). Throughout the 8 weeks wheel rotations were continuously collected in 1 min intervals via magnetic switches interfaced to a computer using the VitalView software (Respironics, Bend, OR). Sedentary mice were deliberately not housed in cages with locked wheels since mice climb in locked wheels [31–33] and we wanted to limit physical activity in the sedentary group. Animals were weighted weekly, throughout the experiment.

### 2.3. Tissue collection and RNA isolation

Animals were sacrificed by rapid decapitation without anesthesia in the early afternoon 8 weeks after individually housing with or

without a running wheel. The whole hippocampus was dissected on a chilled glass dish and immediately placed into RNAlater solution (Qiagen, Valencia, CA) and stored at  $-20^{\circ}\text{C}$  until RNA isolation. Hippocampal samples were homogenized and RNA purified (RNeasy Mini kit, Qiagen, Valencia, CA), then quantified and assessed for purity using a NanoDrop ND-1000 Spectrophotometer (NanoDrop Technologies, Wilmington, DE) and an Agilent 2100 bioanalyzer (Agilent Technologies, Santa Clara CA).

### 2.4. Illumina microarray

For Illumina microarray analysis, samples were prepared and analyzed by the W. M. Keck Center for Comparative and Functional Genomics in the Roy J. Carver Biotechnology Center at the University of Illinois at Urbana-Champaign. RNA quality was determined using the Agilent 2100 Bioanalyzer (Agilent Technologies, Palo Alto, CA). 300 ng of high quality total RNA were primed with an oligo(dT) primer bearing a T7 promoter, and reverse transcribed in the first-strand cDNA synthesis using the Illumina TotalPrep RNA Amplification Kit (Ambion, Inc., Austin, TX). Single stranded cDNA was then converted into double stranded cDNA according to the manufacturer's instructions. The double-stranded cDNA was purified and served as a template in the 14-hour *in vitro* transcription (IVT) reaction. Prior to hybridization, the synthesized biotin labeled cRNA was cleaned up using the same Amplification Kit. After the quality control assessment, 1.5  $\mu\text{g}$  of cRNA from each experimental sample along with hybridization controls were hybridized for 16 hours to the MouseWG-6 v2 Expression BeadChips (Illumina, Inc., San Diego, CA) in the  $58^{\circ}\text{C}$  Illumina Hybridization Oven. Washing, staining with streptavidin-Cy3 (GE Healthcare Bio-Sciences, Piscataway, NJ), and scanning was performed according to the Illumina Whole-Genome Gene Expression Direct Hybridization Assay Guide (revision A). Four BeadChips were used in this study, each containing six arrays. The arrays were scanned using an Illumina BeadArray Reader. Each array image was visually screened to discount for signal artifacts, scratches or debris. The images were analyzed using the GeneExpression Analysis Module (version 1.6.0) of the Illumina GenomeStudio software.

### 2.5. qRT-PCR

To confirm microarray results, five genes (see Table 1) that showed significant changes in expression from exercise and/or age were selected from the microarray results. The amount of specific mRNA transcript present in each hippocampal sample was determined by two-step quantitative real-time reverse-transcription polymerase chain reaction (qRT-PCR). Each sample was run in triplicate for each gene. The amount of mRNA present was determined by utilizing TaqMan<sup>TM</sup> probe and primer chemistry (Applied Biosystems, Foster City, CA) specifically designed to bind to reverse-transcribed cDNA of the genes of interest using an Applied Biosystems 7900HT PCR instrument (Applied Biosystems, Foster City, CA). Fluorescence data ( $\Delta\text{Rn}$ ) was exported from the Applied Biosystems SDS software and analyzed by DART (Data Analysis for RT-PCR) [34]. Gene expression data were normalized by dividing the  $\text{R}_0$  values of the target genes by the  $\text{R}_0$  values of the endogenous control gene 18S.

### 2.6. Statistical analysis

RT-PCR gene expression data were analyzed by two-way analysis of variance (ANOVA) with Age and Exercise condition as the between-subjects variables. Body weight and distance ran was analyzed by repeated measures ANOVA with Age and Exercise condition as the between-subjects variables and Day as the within-

**Table 1.** Genes selected for RT-PCR.

| Gene name                              | Assay ID      |
|----------------------------------------|---------------|
| Brain derived neurotrophic factor      | Mm01334047_m1 |
| Beta-2 microglobulin                   | Mm00437762_m1 |
| Glutathione peroxidase 8 (putative)    | Mm01297261_m1 |
| Complement component 4B                | Mm00437893_g1 |
| Histocompatibility 2, D region locus 1 | Mm04208019_gH |
| 18S (endogenous control)               | Hs99999901_s1 |

doi:10.1371/journal.pone.0022654.t001

subjects (i.e., repeated-measure) variable. An alpha level of  $p < 0.05$  was considered statistically significant.

## 2.7. Microarray data analysis

Probe-level bead summary data were provided by the Illumina Bead Studio toolkit. The intensities were normalized using the Bioconductor lumi R package [35]. Transformation included background correction, variance stabilizing transformation and quantile normalization method [36]. The normalized values were analyzed using the Bioconductor R/manova package and the PROC MIXED procedure in SAS/STAT Version 9.2 (SAS Institute Inc., Cary, NC, USA). The mixed effects model used to describe the normalized expression measurements included the main fixed effects of age and exercise, the interaction between age and exercise and the random effect of Bead array. A False Discovery Rate multiple-test adjustment was implemented on the P-values resulting from the analysis [37], only genes significant at  $p < 0.005$  were included in the analysis.

The raw and normalized microarray data were deposited into the Gene Expression Omnibus (GEO) public database in compliance with Minimum Information About a Microarray Experiment (MIAME) guidelines (Accession number is GSE29075).

## 2.8. Functional class analysis by gene ontology

To identify functionally related categories of genes, significant genes from the main effects of Age and Exercise were individually imported into DAVID Bioinformatics database [38,39] and clustered into biological process gene ontology (GO) terms. Enriched functional categories were calculated by a Fisher Exact test. Only categories that consisted of 3 or more genes and had an FDR of less than 5% were included in the final list of overrepresented GO categories.

## Results

### 3.1. Body weight

As expected, aged mice weighed more than adult mice ( $F(1,16) = 107.7; p < 0.0001$ , see Figure 1). There was also a significant main effect of Exercise condition ( $F(1,16) = 6.46; p < 0.05$ ; see Figure 1), as mice with access to running wheels weighed less than sedentary mice.

### 3.2. Wheel running data

There was a significant main effect of Day for distance (km) run per day ( $F(55,220) = 5.93; p < 0.0001$ ). Inspection of Figure 2 shows that distance run tended to increase daily across both age groups the first month and then decline daily the second month. Overall aged mice ran significantly less than adult mice as show by a

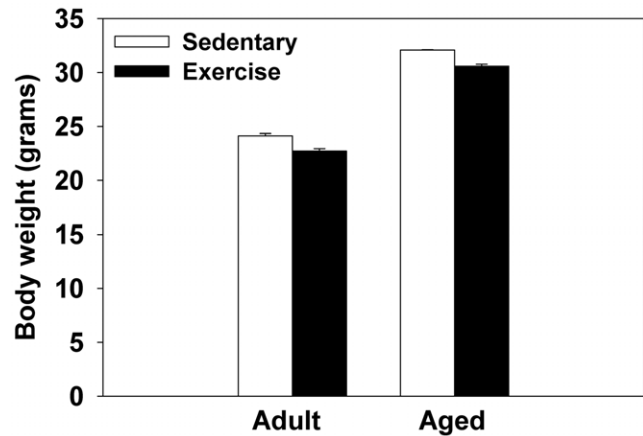**Figure 1.** Average body weight (grams) of adult and aged mice.Means  $\pm$  standard error of the mean (SEM).

doi:10.1371/journal.pone.0022654.g001

significant main effect of Age ( $F(1,4) = 12.7; p < 0.05$ ; see Figure 2). Aged mice ran an average of 4.75 km/day and adult mice ran an average of 7.20 km/day.

## 3.3. Microarray results

**3.3.1. Age-related changes in hippocampal gene expression.** A total of 1,193 genes were differentially expressed in adult and aged mice (596 upregulated and 597 downregulated; see Table S2). GO analysis revealed that aged mice showed significant enrichment of categories related to chromatin remodeling, antigen presentation, cell cycle, response to hormones, organization of synapses, and lipid metabolism (EASE score  $p < 0.002$  and  $FDR < 5\%$ ; see Table 2). The top five gene ontologies, starting with the most enriched, are “cellular macromolecular complex subunit organization, DNA packaging, antigen processing and presentation of peptide antigen, macromolecular complex subunit organization, and chromosome organization” indicating that aged mice show numerous alterations in chromatin organization as well as some changes in immune activity compared to adult mice.

**3.3.2. Exercise-induced changes in hippocampal gene expression.** Wheel running altered expression of 838 (526 upregulated and 312 downregulated; collapsed across age groups) genes (see Table S3). Functional analysis via DAVID and

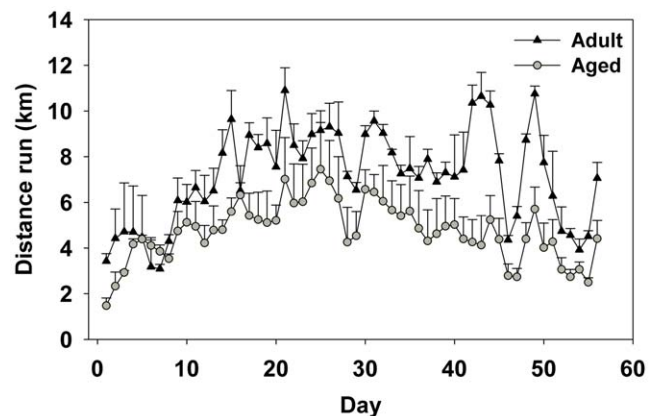**Figure 2.** Average distance (km) ran per day by aged and adult mice over eight weeks of running wheel access. Means  $\pm$  SEM.

doi:10.1371/journal.pone.0022654.g002

**Table 2.** Age-induced changes.

| GO term                                                         | Gene count | P value | FDR  |
|-----------------------------------------------------------------|------------|---------|------|
| <b>Chromatin remodeling</b>                                     |            |         |      |
| GO:0051276~chromosome organization                              | 43         | 0.0001  | 0.25 |
| GO:0006325~chromatin organization                               | 35         | 0.0003  | 0.52 |
| GO:0006333~chromatin assembly or disassembly                    | 17         | 0.0003  | 0.59 |
| GO:0006323~DNA packaging                                        | 17         | 0.0001  | 0.20 |
| GO:0031497~chromatin assembly                                   | 14         | 0.0002  | 0.30 |
| GO:0043933~macromolecular complex subunit organization          | 40         | 0.0001  | 0.20 |
| GO:0065003~macromolecular complex assembly                      | 35         | 0.0008  | 1.38 |
| GO:0034621~cellular macromolecular complex subunit organization | 30         | 0.0001  | 0.18 |
| GO:0034622~cellular macromolecular complex assembly             | 26         | 0.0004  | 0.72 |
| GO:0065004~protein-DNA complex assembly                         | 14         | 0.0002  | 0.35 |
| GO:0034728~nucleosome organization                              | 14         | 0.0002  | 0.35 |
| GO:0006334~nucleosome assembly                                  | 13         | 0.0005  | 0.86 |
| <b>Antigen presentation</b>                                     |            |         |      |
| GO:0019882~antigen processing and presentation                  | 13         | 0.0009  | 1.67 |
| GO:0048002~antigen processing & presentation of peptide antigen | 10         | 0.0001  | 0.20 |
| GO:0002474~antigen processing & presentation via MHC I          | 7          | 0.0002  | 0.35 |
| <b>Cell cycle</b>                                               |            |         |      |
| GO:0000278~mitotic cell cycle                                   | 28         | 0.0011  | 2.00 |
| GO:0022403~cell cycle phase                                     | 36         | 0.0004  | 0.68 |
| GO:0007049~cell cycle                                           | 57         | 0.0004  | 0.72 |
| GO:0022402~cell cycle process                                   | 39         | 0.0015  | 2.67 |
| <b>Hormone response</b>                                         |            |         |      |
| GO:0009725~response to hormone stimulus                         | 21         | 0.0009  | 1.50 |
| GO:0009719~response to endogenous stimulus                      | 23         | 0.0006  | 1.11 |
| GO:0043434~response to peptide hormone stimulus                 | 15         | 0.0008  | 1.33 |
| <b>Synapse organization</b>                                     |            |         |      |
| GO:0050808~synapse organization                                 | 10         | 0.0017  | 3.03 |
| GO:0050803~regulation of synapse structure and activity         | 6          | 0.0013  | 2.26 |
| <b>Lipid metabolism</b>                                         |            |         |      |
| GO:0045834~positive regulation of lipid metabolic process       | 7          | 0.0022  | 3.87 |

Enriched functional categories associated with aging. GO terms are ordered within subcategories by Fisher exact test p value (i.e., EASE score) with highest enriched term at the top of each list. False discovery rates (FDR) are expressed as percentage scores.  
doi:10.1371/journal.pone.0022654.t002

assignment to GO categories revealed that for both the adult and aged mice exercise influenced expression of genes that participate in chromatin remodeling, intracellular transport, growth, and protein autophosphorylation. A majority of the GO terms were related to chromatin remodeling. The top five enriched categories consisted of “cellular macromolecular complex assembly, chromatin assembly or disassembly, nucleosome assembly, chromatin organization, and chromatin assembly” (EASE score  $p < 0.002$  and  $FDR < 5\%$ ; see Table 3).

**3.3.3. Opposing effects of age and exercise on hippocampal gene expression.** Comparison of the genes altered by age or exercise revealed that 117 genes showed differential expression in response to aging and exercise (for complete list see Table S1). Analysis of the top 30 genes that showed the largest age-related increase or decrease in expression demonstrates that wheel running modulated expression of genes involved in a variety of physiological processes such as cell growth and migration, immune activity, chromatin organization, and mRNA translation. Aged mice showed

a significant increase in expression of complement component 4B (C4B), solute carrier family 38 (SLC38A2), Von Willebrand factor (VWF), AHNAK nucleoprotein (AHNAK), CDC-like kinase 1 (CLK1), chromodomain helicase DNA binding protein 7 (CHD7), insulin-like growth factor receptor 1 (IGF1R), CDC-like kinase 4 (CLK4), polymerase III polypeptide (POLR3E), nuclear factor kappa polypeptide B-cell inhibitor (NFKBIA), sema domain immunoglobulin 4B (SEMA4B), potassium voltage-gated channel Q2 (KCNQ2), gametogenetin binding protein 1 (GGNBP1), lamin A (LMNA), and solute carrier family 6 (SLC6A6). Whereas wheel running significantly decreased expression of all of these genes ( $p < 0.005$ ; see Figure 3A and Table 4). Similarly, aged mice showed decreased expression of doublecortin-like kinase 1 (DCAMKL1), Fc receptor-like S (MSR2), abhydrolase domain containing 12 (ABD12), shadow of a prion protein (SPRN), tubulin beta 2 (TUBB2B), phosphofructokinase platelet (PFKP), cyclin D1 (CCND1), lymphocyte antigen complex 6 (LY6G6E), Rho guanine nucleotide exchange factor (ARHGEF7), abhydrolase

**Table 3.** Exercise-induced changes.

| GO Term                                                         | Gene count | P value | FDR  |
|-----------------------------------------------------------------|------------|---------|------|
| <b>Chromatin remodeling</b>                                     |            |         |      |
| GO:0034622~cellular macromolecular complex assembly             | 22         | 0.0001  | 0.21 |
| GO:0006333~chromatin assembly or disassembly                    | 14         | 0.0003  | 0.58 |
| GO:0006334~nucleosome assembly                                  | 11         | 0.0004  | 0.72 |
| GO:0006325~chromatin organization                               | 27         | 0.0005  | 0.81 |
| GO:0031497~chromatin assembly                                   | 11         | 0.0005  | 0.92 |
| GO:0065004~protein-DNA complex assembly                         | 11         | 0.0006  | 1.03 |
| GO:0034728~nucleosome organization                              | 11         | 0.0006  | 1.03 |
| GO:0034621~cellular macromolecular complex subunit organization | 22         | 0.0007  | 1.19 |
| GO:0065003~macromolecular complex assembly                      | 27         | 0.0010  | 1.80 |
| GO:0006323~DNA packaging                                        | 12         | 0.0018  | 3.01 |
| GO:0051276~chromosome organization                              | 30         | 0.0021  | 3.54 |
| <b>Intracellular transport</b>                                  |            |         |      |
| GO:0046907~intracellular transport                              | 33         | 0.0006  | 1.12 |
| <b>Regulation of growth</b>                                     |            |         |      |
| GO:0040008~regulation of growth                                 | 22         | 0.0014  | 2.49 |
| <b>Protein autophosphorylation</b>                              |            |         |      |
| GO:0046777~protein amino acid autophosphorylation               | 10         | 0.0014  | 2.39 |

Enriched functional categories associated with wheel running. GO terms are ordered within subcategories by p value (EASE score) with highest enriched term at the top of the list. FDRs are expressed as percentage scores.

doi:10.1371/journal.pone.0022654.t003

domain containing 1 (ABHD1), histone cluster 2 H3e (HIST1H3E), TAF10 RNA polymerase II (TAF10), mitochondrial ribosomal protein 63 (MRP63), transmembrane protein 158 (TMEM158), and monooxygenase (MOXD1), however, wheel running increased expression of all of these genes ( $p < 0.005$ ; see Figure 3B and Table 4).

### 3.4. qRT-PCR

Analysis revealed that BDNF, H2-D1,  $\beta$ 2M, C4B, and GPX8 showed comparable expression when determined by RT-PCR or microarray, confirming results from the microarray experiment. Aged mice had significantly increased expression of  $\beta$ 2M, H2-D1, and C4B compared to adult mice [main effects of Age ( $F(1,16) = 5.69$ ;  $p < 0.05$ )  $\beta$ 2M, ( $F(1,16) = 16.63$ ;  $p < 0.001$ ) H2-D1, and ( $F(1,14) = 121.69$ ;  $p < 0.001$ ) C4B]. BDNF expression did not differ between adult and aged mice. Additionally, aged mice showed decreased expression of GPX8 ( $F(1,16) = 4.66$ ;  $p < 0.05$ ) compared to adult mice. Wheel running was confirmed to significantly increase expression of BDNF ( $F(1,16) = 6.94$ ;  $p < 0.05$ ) and decrease C4B expression ( $F(1,14) = 16.743.86$ ;  $p < 0.001$ ) compared to sedentary mice.

## Discussion

The rate of brain aging appears to be dependent on lifestyle factors, as individuals that maintain an active healthy lifestyle show reduced risk for age-related neuropathologies [22]. The primary objective of this study was to identify genes and/or functional categories of genes that showed differential regulation in response to aging and exercise to provide insight into the anti-aging effects of exercise. Such knowledge may facilitate development of novel treatments to slow or prevent the effects of both normal and pathological aging.

We identified one-hundred and seventeen genes that showed differential regulation by age and exercise (see Table S1). Analysis

of the top 30 genes revealed that several of them participate in cell growth and/or migration (see Figure 3). Aging is well known to disrupt cellular division. For instance, the rate of neurogenesis is drastically reduced with aging [2,5,11]. In agreement, we found that aged mice showed reduced expression of several genes involved in cellular mitosis, such as cyclin D1 (CCND1), cell division cycle associated 2 (CDC2), cell division cycle associated 8 (CDC8), leishmanolysin-like (LMLN), and baculoviral IAP repeat-containing 5 (BIRC5) (see Table S2). These data in combination with prior work that show reduced hippocampal neurogenesis in aged animals [2,5,11] indicate that aging is associated with reduced cellular proliferation.

Engaging in aerobic exercise is known to enhance hippocampal neurogenesis in both young and aged animals [2,17,18]. Our data provide potential transcription changes that may contribute to the exercise-induced increase in neurogenesis. A portion of the age-related changes in genes related to cell growth showed enhanced expression in response to exercise. For example, aged mice showed reduced expression of doublecortin-like kinase-1 (DCAMKL1), cyclin D1 (CCND1), and tubulin  $\beta$ 2 (TUBB2B) compared to adult mice, whereas exercise was found to upregulate these genes in both adult and aged mice. DCAMKL1 participates in several cellular processes such as neurogenesis, neural migration, and retrograde transport [40]. TUBB2B is a microtubule element expressed mainly in post-mitotic neurons and CCND1 participates in cellular proliferation by facilitating progression through the cell-cycle [41]. Collectively, these findings suggest that exercise can restore the proliferative capacity of the hippocampus and highlight potential transcription alterations that may underlie this effect.

By far the largest category of genes modified by age was chromatin remodeling. Maintaining the structure of chromatin is crucial for normal transcription. Our data show an age-related decline in the expression of genes for histone proteins, the core components of nucleosomes, and increased expression of genes for

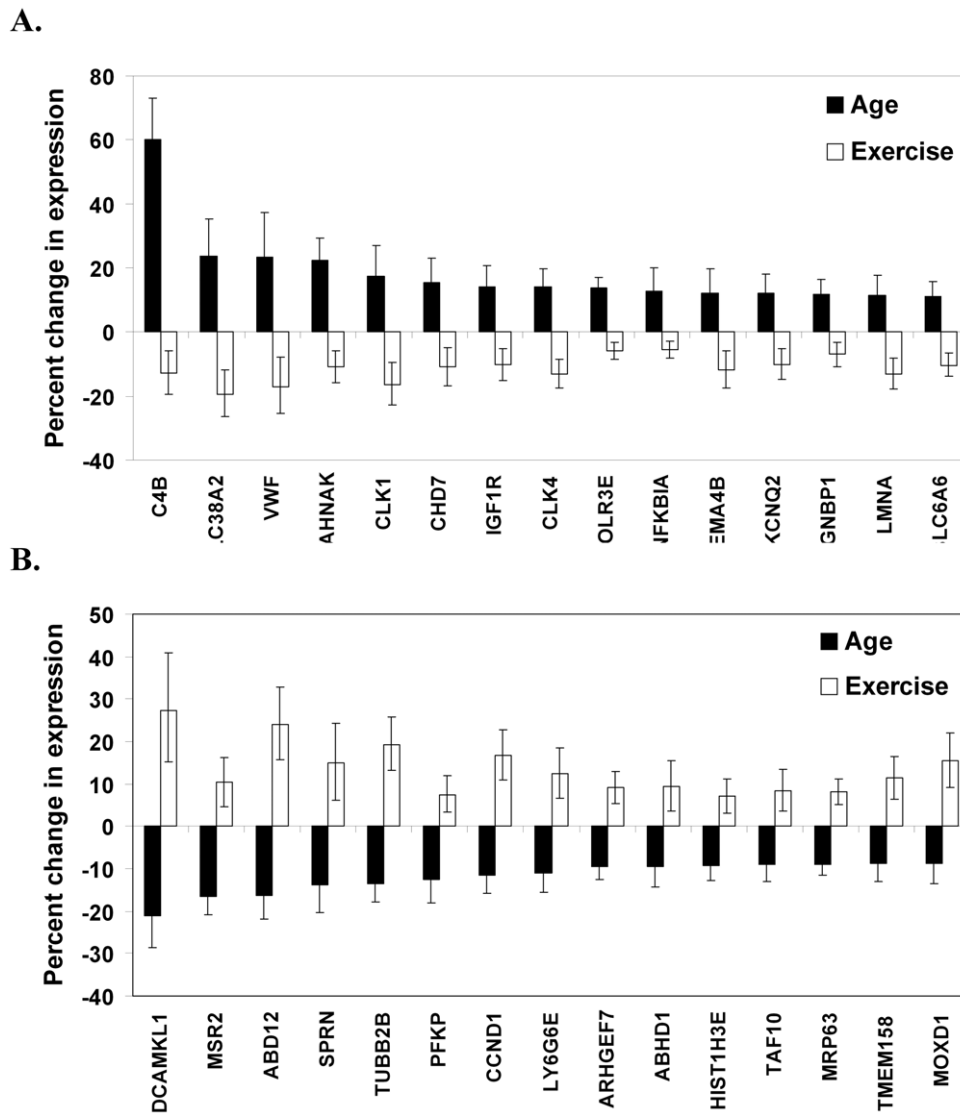

**Figure 3. Differential regulation of gene expression by age and exercise.** (A) Individual genes that showed the largest increase in expression in aged mice, and were downregulated by wheel running. (B) Genes that showed the largest decrease in expression in aged mice relative to adults, but were increased by exercise. Black bars represent percent change in gene expression in aged mice (collapsed across exercise condition) relative to adult mice (age comparison)  $\pm$ 95% confidence intervals. White bars represent percent change in gene expression in runners (collapsed across age groups) relative to sedentary mice (exercise comparison)  $\pm$ 95% confidence intervals. For gene description see Table 4. doi:10.1371/journal.pone.0022654.g003

ATP-dependent chromatin remodelers chromatin helicase DNA-binding protein 7 (CHD7) and SWI/SNF related, matrix associated, actin dependent regulator of chromatin (SMARCD2) [42,43]. Prior work suggests that the age-related reduction in histone proteins may loosen the chromatin structure increasing the likelihood of aberrant transcription and access to agents that can damage DNA [44]. The observed increase in CHD7 expression in combination with the reduction in histone expression in the aged may indicate increased transcription. In accordance we observed increased expression of over 500 genes in the aged compared to the adult mice. There is evidence in yeast cells that restoring histone levels increases lifespan, indicating that aspects of aging can be improved by normalizing chromatin structure [45].

In addition to transcriptional changes, abnormal mRNA translation may increase with age. In support, we observed that aged mice showed increased expression of CDC-like kinase-1

(CLK-1) and CDC-like kinase-4 (CLK-4) that appear to regulate mRNA splicing through altering the activity of spliceosomes [46]. Improper RNA splicing can result in abnormal translation of RNA and is associated with many age-related diseases including macular degeneration and Alzheimer's disease [47]. Additionally, aged mice showed reduced expression of TAF10 RNA polymerase (TAF10) that plays a role initiating transcription [48] and decreased expression of RNA polymerase III (POLR3E) that participates in pre-mRNA splicing and transcription [49]. While we cannot confirm from the present data whether aging increases the frequency of improper RNA slicing, the results indicate that pre-mRNA splicing may be vulnerable to age-related alterations.

Exercise was found to differentially influence expression of many of the genes involved in chromatin remodeling and transcription that showed an age-related change in expression. For example, aged mice showed reduced expression of the histone

**Table 4.** Genes that showed differential expression from age and exercise.

| Gene ID                           | Gene Name                                                                      | % change Aged | % change Exercise |
|-----------------------------------|--------------------------------------------------------------------------------|---------------|-------------------|
| <b>Chromatin</b>                  |                                                                                |               |                   |
| HIST1H3E                          | histone cluster 2, H3e                                                         | -9.32         | 7.11              |
| CHD7                              | chromodomain helicase DNA binding protein 7                                    | 15.20         | -10.95            |
| LMNA                              | lamin A                                                                        | 11.39         | -13.06            |
| <b>Cell growth/migration</b>      |                                                                                |               |                   |
| DCAMKL1                           | doublecortin-like kinase 1                                                     | -21.17        | 27.34             |
| TUBB2B                            | tubulin, beta 2a, pseudogene 2; tubulin, beta 2B                               | -13.43        | 19.24             |
| CCND1                             | cyclin D1                                                                      | -11.51        | 16.77             |
| TMEM158                           | transmembrane protein 158                                                      | -8.86         | 11.38             |
| SEMA4B                            | sema domain, immunoglobulin domain, transmembrane, 4B                          | 12.07         | -11.71            |
| <b>Immune function</b>            |                                                                                |               |                   |
| MSR2                              | Fc receptor-like 5, scavenger receptor                                         | -16.49        | 10.33             |
| SPRN                              | shadow of prion protein                                                        | -13.90        | 14.95             |
| LY6G6E                            | lymphocyte antigen 6 complex, locus G6E                                        | -11.06        | 12.41             |
| C4B                               | complement component 4B                                                        | 59.96         | -12.89            |
| NFKBIA                            | nuclear factor kappa light polypeptide enhancer in B-cells inhibitor, $\alpha$ | 12.81         | -5.58             |
| <b>Transcription/translation</b>  |                                                                                |               |                   |
| TAF10                             | TAF10 RNA polymerase II, TATA box binding protein-associated factor            | -9.01         | 8.41              |
| CLK1                              | CDC-like kinase 1                                                              | 17.40         | -16.37            |
| CLK4                              | CDC like kinase 4                                                              | 13.92         | -13.11            |
| POLR3E                            | polymerase (RNA) III (DNA directed) polypeptide E                              | 13.60         | -5.87             |
| <b>Blood glycoprotein</b>         |                                                                                |               |                   |
| VWF                               | Von Willebrand factor homolog                                                  | 23.38         | -17.02            |
| <b>Cell communication</b>         |                                                                                |               |                   |
| KCNQ2                             | potassium voltage-gated channel, subfamily Q, member 2                         | 11.96         | -10.27            |
| SLC6A6                            | solute carrier family 6 (neurotransmitter transporter, taurine)                | 11.10         | -10.35            |
| <b>Intracellular signaling</b>    |                                                                                |               |                   |
| ARHGEF7                           | Rho guanine nucleotide exchange factor (GEF7)                                  | -9.53         | 9.12              |
| <b>Mitochondria</b>               |                                                                                |               |                   |
| MRP63                             | mitochondrial ribosomal protein 63                                             | -8.92         | 8.19              |
| <b>Neuroblast differentiation</b> |                                                                                |               |                   |
| AHNAK                             | AHNAK nucleoprotein (desmoyokin)                                               | 22.40         | -10.91            |
| <b>Dopamine activity</b>          |                                                                                |               |                   |
| MOXD1                             | monooxygenase, DBH-like 1                                                      | -8.69         | 15.50             |
| <b>Endocannabinoid</b>            |                                                                                |               |                   |
| ABD12                             | abhydrolase domain containing 12                                               | -16.18        | 24.01             |
| <b>Glutamate activity</b>         |                                                                                |               |                   |
| SLC38A2                           | solute carrier family 38, member 2                                             | 23.52         | -19.50            |
| <b>Glycolysis</b>                 |                                                                                |               |                   |
| PFKP                              | phosphofructokinase, platelet                                                  | -12.51        | 7.50              |
| <b>IGF activity</b>               |                                                                                |               |                   |
| IGF1R                             | insulin-like growth factor I receptor                                          | 13.93         | -10.26            |
| <b>Enzymatic function</b>         |                                                                                |               |                   |
| ABHD1                             | abhydrolase domain containing 1                                                | -9.50         | 9.43              |
| <b>Spermatogenesis</b>            |                                                                                |               |                   |
| GGNBP1                            | gametogenetin binding protein 1                                                | 11.64         | -6.99             |

Functional categorization of the top 30 genes that showed differential expression in response to age and exercise. Positive values indicate the percent increase in expression and negative values indicate a decrease in expression.

doi:10.1371/journal.pone.0022654.t004

protein H3E, but wheel running was found to increase H3E expression. Additionally, we found that exercise reduced the expression of CHD7, which showed increased expression in hippocampal samples from the aged animals. Exercise reduced expression of the genes involved in pre-mRNA splicing CLK-1, CLK-4, and POLR3E and increased expression of TAF10 that participates in basal transcription. These data indicate that exercise may restore age-related changes in chromatin modification and possibly prevent these changes in adults both of which would better protect DNA and regulate transcription.

Aging is associated with the development of low-grade neuroinflammation that may result from increased activation of the brain's resident immune cells, microglia [14,50]. In agreement, our findings indicate an age-related increase in immune activity within the brain [14,51,52]. For example, a major group of genes upregulated in the aged mice were related to the major histocompatibility complex (MHC) class I receptor (e.g.,  $\beta$ 2-microglobulin and H2-D1). In addition, aged mice showed increased expression of several elements of the complement system including complement component 4A (C4A), C4B, C3, and C1q, which facilitate phagocytosis of cells or bacteria through opsonization. C1q binds to neurons as they have low expression of complement resistant molecules such as DAF and CD59 [53]. This raises the possibility that neurons in the aged brain may be at greater risk of destruction through C1q labeling. Additionally, increased expression of C1, C3 and C4 mRNA has been found in the brains of Alzheimer patients, and is thought to contribute to the progression of Alzheimer's disease by inducing microglia activation and proinflammatory cytokine release [54]. Collectively, these age-related changes in neuroinflammation may contribute to the increased vulnerability to age-related cognitive decline and the progression of neurodegenerative diseases.

Exercise may offer neuroprotection through regulating aspects of immune activity. Prior studies have found that exercise in adult subjects increases expression of anti-inflammatory molecules while reducing inflammatory mediators [14,29,52,55]. Our data show that wheel running reduced expression of C4B which is released from microglia following an immune stimulus [56]. Additionally, wheel running enhanced expression of shadow of a prion protein (SPRN), a gene that encodes for the protein Sho that has neuroprotective-like effects against infection with a prion [57]. SPRN expression was reduced in the aged mice, but was elevated in response to exercise. Though more work is needed to fully elucidate the ability of exercise to attenuate neuroinflammation, particularly in aged subjects, these data provide evidence that exercise may afford some protection by modulating immune activity within the brain.

The trophic factor, insulin-like growth factor (IGF), plays a complex role in the aging process. Research on age-related alterations in IGF levels in the brain has show inconsistent results, as some report a decrease whereas others fail to detect a difference [58,59]. However, there is evidence to suggest that expression of the IGF type I receptor (IGFR1) increases with age [58]. Our findings confirm this result, as aged mice showed increased expression of IGFR1 in the hippocampus, and additionally show that wheel running reduced IGFR1 expression. The age-related increase in IGFR1 may occur in response to low IGF levels or may be a compensatory mechanism to overcome resistance or functional deficits in the receptor signaling cascade [60,61]. Given that exercise increases expression of IGF [62], the exercise-induced reduction in IGFR1 may result from stabilizing trophic support in the aged brain.

Alterations in mitochondria function are a central theory of aging. Mitochondria are a primary energy source throughout the

body and therefore a decline in their function disrupts normal cellular activity and could ultimately lead to cell death [63]. In support, we observed that aged mice showed reduced expression of mitochondrial ribosomal protein 63 (MPR63), which is known to aid in protein synthesis within mitochondria [64,65]. Further, we observed that exercise increased expression of MRP63. This finding is in agreement with prior work that indicates some of the beneficial effects of exercise are mediated through its influence on mitochondria [63].

In agreement with prior reports, wheel running significantly increased expression of brain derived neurotrophic factor (BDNF) in both adult and aged mice [29]. BDNF is believed to mediate the beneficial effects of exercise on cell growth, proliferation, and possibly cognitive enhancements [66,67]. In addition to BDNF, we observed that a GO term related to growth was significantly enriched from exercise. For example, wheel running was found to increase expression of poly (ADP-ribose) polymerase 1 (PARP1) and RuvB-like protein 1 (RUVBL1), genes involved in repairing damage to DNA and maintaining genomic stability [68,69]. Exercise was found to suppress expression of BCL2 binding component 3 (BBC3), a gene that can initiate apoptosis [70]. These findings confirm that exercise independent of age supports brain health by initiating growth and protection against destructive events.

Collectively, these data highlight transcriptional changes that may mediate the anti-aging effects of exercise. Our findings confirm prior microarray experiments that assessed gene transcription changes in response to exercise [29], aging [13,14,52,71], or exercise only in aged mice [28]. Ultimately, our findings indicate that the beneficial effects of exercise likely result from changes in multiple pathways that may be restorative in aged subjects, but also act as a preventive measure in younger subjects. The data emphasize that effective anti-aging treatments need to combat a complex array of changes. Wheel running was found to regulate chromatin structure, cell growth, immune activity, and trophic factors opposing many of the age-related changes in these categories. Findings argue that the therapeutic effects of exercise likely results from its ability to modulate a broad range of processes that are altered by normal aging.

## Supporting Information

**Table S1 List the individual genes that showed differential regulation in response to aging and wheel running.** The percent change in aged column shows the percent change in gene expression in aged mice (collapsed across exercise condition) relative to adult mice (age comparison)  $\pm$ 95% confidence intervals. The percent change in exercise column list the percent change in gene expression in runners (collapsed across age groups) relative to sedentary mice (exercise comparison)  $\pm$ 95% confidence intervals.

(DOC)

**Table S2 Age-induced changes in gene expression in the hippocampus.** Columns list the percent change in gene expression in aged mice (collapsed across exercise condition) relative to adult mice  $\pm$ 95% confidence intervals for an individual gene. Positive values indicate the percent increase in expression and negative values indicate a decrease in expression. FDRs are expressed as percentage scores.

(DOC)

**Table S3 Exercise-induced changes in gene expression in the hippocampus.** Columns list the percent change in gene expression in runners (collapsed across age) compared to sedentary



mice  $\pm 95\%$  confidence intervals for an individual gene. Positive values indicate the percent increase in expression and negative values indicate a decrease in expression. FDRs are expressed as percentage scores. (DOC)

## Acknowledgments

We thank Dr. Mark Band and Tanya Akraiko from the W.M. Keck center for Comparative and Functional Genomics at the University of Illinois for running the Illumina microarray.

## References

- Erickson KI, Prakash RS, Voss MW, Chaddock L, Heo S, et al. (2010) Brain-derived neurotrophic factor is associated with age-related decline in hippocampal volume. *J Neurosci* 30: 5368–75.
- van Praag H, Shubert T, Zhao C, Gage FH (2005) Exercise enhances learning and hippocampal neurogenesis in aged mice. *J Neurosci* 25: 8680–5.
- Murray CA, Lynch MA (1998) Dietary supplementation with vitamin E reverses the age-related deficit in long term potentiation in dentate gyrus. *J Biol Chem* 273: 12161–8.
- Mora F, Segovia G, del Arco A (2007) Aging, plasticity and environmental enrichment: structural changes and neurotransmitter dynamics in several areas of the brain. *Brain Res Rev* 55: 78–88.
- Bizon JL, Lee HJ, Gallagher M (2004) Neurogenesis in a rat model of age-related cognitive decline. *Aging Cell* 3: 227–34.
- Erickson KI, Prakash RS, Voss MW, Chaddock L, Hu L, et al. (2009) Aerobic fitness is associated with hippocampal volume in elderly humans. *Hippocampus* 19: 1030–9.
- Malykhin NV, Bouchard TP, Camicioli R, Coupland NJ (2008) Aging hippocampus and amygdala. *Neuroreport* 19: 543–7.
- Terry AV Jr., Kutiyawalla A, Pillai A (2011) Age-dependent alterations in nerve growth factor (NGF)-related proteins, sortilin, and learning and memory in rats. *Physiol Behav* 102: 149–57.
- Moyer JR Jr., Brown TH (2006) Impaired trace and contextual fear conditioning in aged rats. *Behav Neurosci* 120: 612–24.
- Brandeis R, Dachir S, Sapir M, Levy A, Fisher A (1990) Reversal of age-related cognitive impairments by an M1 cholinergic agonist, AF102B. *Pharmacol Biochem Behav* 36: 89–95.
- Ahlenius H, Visan V, Kokaia M, Lindvall O, Kokaia Z (2009) Neural stem and progenitor cells retain their potential for proliferation and differentiation into functional neurons despite lower number in aged brain. *J Neurosci* 29: 4408–19.
- von Bohlen und Halbach O, Zacher C, Gass P, Unsicker K (2006) Age-related alterations in hippocampal spines and deficiencies in spatial memory in mice. *J Neurosci Res* 83: 525–31.
- Blalock EM, Chen KC, Sharrow K, Herman JP, Porter NM, et al. (2003) Gene microarrays in hippocampal aging: statistical profiling identifies novel processes correlated with cognitive impairment. *J Neurosci* 23: 3807–19.
- Verbitsky M, Yonan AL, Malleret G, Kandel ER, Gilliam TC, et al. (2004) Altered hippocampal transcript profile accompanies an age-related spatial memory deficit in mice. *Learn Mem* 11: 253–60.
- Fontan-Lozano A, Lopez-Luch G, Delgado-Garcia JM, Navas P, Carrion AM (2008) Molecular bases of caloric restriction regulation of neuronal synaptic plasticity. *Mol Neurobiol* 38: 167–77.
- Adams MM, Shi L, Linville MC, Forbes ME, Long AB, et al. (2008) Caloric restriction and age affect synaptic proteins in hippocampal CA3 and spatial learning ability. *Exp Neurol* 211: 141–9.
- Clark PJ, Brzezinska WJ, Thomas MW, Ryzhenko NA, Toshkov SA, et al. (2008) Intact neurogenesis is required for benefits of exercise on spatial memory but not motor performance or contextual fear conditioning in C57BL/6J mice. *Neuroscience* 155: 1048–58.
- van Praag H, Christie BR, Sejnowski TJ, Gage FH (1999) Running enhances neurogenesis, learning, and long-term potentiation in mice. *Proc Natl Acad Sci U S A* 96: 13427–31.
- Dishman RK, Berthoud HR, Booth FW, Cotman CW, Edgerton VR, et al. (2006) Neurobiology of exercise. *Obesity (Silver Spring)* 14: 345–56.
- Lakka TA, Laaksonen DE (2007) Physical activity in prevention and treatment of the metabolic syndrome. *Appl Physiol Nutr Metab* 32: 76–88.
- Xu Q, Park Y, Huang X, Hollenbeck A, Blair A, et al. (2010) Physical activities and future risk of Parkinson disease. *Neurology* 75: 341–8.
- Liang KY, Mintun MA, Fagan AM, Goate AM, Bugg JM, et al. (2010) Exercise and Alzheimer's disease biomarkers in cognitively normal older adults. *Ann Neurol* 68: 311–8.
- Llorens-Martin M, Torres-Aleman I, Trejo JL (2008) Growth factors as mediators of exercise actions on the brain. *Neuromolecular Med* 10: 99–107.
- Christie BR, Eadie BD, Kannangara TS, Robillard JM, Shin J, et al. (2008) Exercising our brains: how physical activity impacts synaptic plasticity in the dentate gyrus. *Neuromolecular Med* 10: 47–58.
- Woods JA, Vieira VJ, Keylock KT (2009) Exercise, inflammation, and innate immunity. *Immunol Allergy Clin North Am* 29: 381–93.
- Cotman CW, Berchtold NC, Christie LA (2007) Exercise builds brain health: key roles of growth factor cascades and inflammation. *Trends Neurosci* 30: 464–72.
- Stranahan AM, Lee K, Mattson MP (2008) Central mechanisms of HPA axis regulation by voluntary exercise. *Neuromolecular Med* 10: 118–27.
- Stranahan AM, Lee K, Becker KG, Zhang Y, Maudsley S, et al. (2008) Hippocampal gene expression patterns underlying the enhancement of memory by running in aged mice. *Neurobiol Aging* 31: 1937–49.
- Tong L, Shen H, Perreau VM, Balazs R, Cotman CW (2001) Effects of exercise on gene-expression profile in the rat hippocampus. *Neurobiol Dis* 8: 1046–56.
- Molteni R, Ying Z, Gomez-Pinilla F (2002) Differential effects of acute and chronic exercise on plasticity-related genes in the rat hippocampus revealed by microarray. *Eur J Neurosci* 16: 1107–16.
- Rhodes JS, van Praag H, Jeffrey S, Girard I, Mitchell GS, et al. (2003) Exercise increases hippocampal neurogenesis to high levels but does not improve spatial learning in mice bred for increased voluntary wheel running. *Behav Neurosci* 117: 1006–16.
- Rhodes JS, Koteja P, Swallow JG, Carter PA, Garland T (2000) Body temperatures of house mice artificially selected for high voluntary wheel-running behavior: repeatability and effect of genetic selection. *J Therm Biol* 25: 391–400.
- Koteja P, Garland T Jr., Sax JK, Swallow JG, Carter PA (1999) Behaviour of house mice artificially selected for high levels of voluntary wheel running. *Anim Behav* 58: 1307–1318.
- Peirson SN, Butler JN, Foster RG (2003) Experimental validation of novel and conventional approaches to quantitative real-time PCR data analysis. *Nucleic Acids Res* 31: e73.
- Du P, Kibbe WA, Lin SM (2008) lumi: a pipeline for processing Illumina microarray. *Bioinformatics* 24: 1547–8.
- Lin SM, Du P, Huber W, Kibbe WA (2008) Model-based variance-stabilizing transformation for Illumina microarray data. *Nucleic Acids Res* 36: e11.
- Yoav B YH (1995) Controlling the False Discovery Rate: a practical and powerful approach to multiple testing. *Journal of the Royal Statistical Society* 57: 289–300.
- Huang da W, Sherman BT, Lempicki RA (2009) Systematic and integrative analysis of large gene lists using DAVID bioinformatics resources. *Nat Protoc* 4: 445–57.
- Dennis G Jr., Sherman BT, Hosack DA, Yang J, Gao W, et al. (2003) DAVID: Database for Annotation, Visualization, and Integrated Discovery. *Genome Biol* 4: P3.
- Shu T, Tseng HC, Sapir T, Stern P, Zhou Y, et al. (2006) Doublecortin-like kinase controls neurogenesis by regulating mitotic spindles and M phase progression. *Neuron* 49: 25–39.
- Witzel II, Koh LF, Perkins ND (2010) Regulation of cyclin D1 gene expression. *Biochem Soc Trans* 38: 217–22.
- Martin DM (2010) Chromatin remodeling in development and disease: focus on CHD7. *PLoS Genet* 6: e1001010.
- Zentner GE, Hurd EA, Schnetz MP, Handoko L, Wang C, et al. (2010) CHD7 functions in the nucleolus as a positive regulator of ribosomal RNA biogenesis. *Hum Mol Genet* 19: 3491–501.
- Feser J, Tyler J (2011) Chromatin structure as a mediator of aging. *FEBS Lett*.
- Feser J, Truong D, Das C, Carson JJ, Kieft J, et al. (2010) Elevated histone expression promotes life span extension. *Mol Cell* 39: 724–35.
- Hanes J, von der Kammer H, Kludiny J, Scheit KH (1994) Characterization by cDNA cloning of two new human protein kinases. Evidence by sequence comparison of a new family of mammalian protein kinases. *J Mol Biol* 244: 665–72.
- Meshorer E, Soreq H (2002) Pre-mRNA splicing modulations in senescence. *Aging Cell* 1: 10–6.
- Indra AK, Mohan WS 2nd, Frontini M, Scheer E, Messaddeq N, et al. (2005) TAF10 is required for the establishment of skin barrier function in foetal, but not in adult mouse epidermis. *Dev Biol* 285: 28–37.
- Hu P, Wu S, Sun Y, Yuan CC, Kobayashi R, et al. (2002) Characterization of human RNA polymerase III identifies orthologues for *Saccharomyces cerevisiae* RNA polymerase III subunits. *Mol Cell Biol* 22: 8044–55.
- Dilger RN, Johnson RW (2008) Aging, microglial cell priming, and the discordant central inflammatory response to signals from the peripheral immune system. *J Leukoc Biol* 84: 932–9.

## Author Contributions

Conceived and designed the experiments: RAK JSR SLR-Z KWK RD. Performed the experiments: RAK. Analyzed the data: RAK SLR-Z BRS. Contributed reagents/materials/analysis tools: JSR RD KWK. Wrote the paper: RAK. Supervised the project and edited the manuscript: JSR KWK RD.

51. Godbout JP, Chen J, Abraham J, Richwine AF, Berg BM, et al. (2005) Exaggerated neuroinflammation and sickness behavior in aged mice following activation of the peripheral innate immune system. *FASEB J* 19: 1329–31.
52. Terao A, Apte-Deshpande A, Dousman L, Morairty S, Eynon BP, et al. (2002) Immune response gene expression increases in the aging murine hippocampus. *J Neuroimmunol* 132: 99–112.
53. Singhrao SK, Neal JW, Rushmere NK, Morgan BP, Gasque P (2000) Spontaneous classical pathway activation and deficiency of membrane regulators render human neurons susceptible to complement lysis. *Am J Pathol* 157: 905–18.
54. Bonifati DM, Kishore U (2007) Role of complement in neurodegeneration and neuroinflammation. *Mol Immunol* 44: 999–1010.
55. Nichol KE, Poon WW, Parachikova AI, Cribbs DH, Glabe CG, et al. (2008) Exercise alters the immune profile in Tg2576 Alzheimer mice toward a response coincident with improved cognitive performance and decreased amyloid. *J Neuroinflammation* 5: 13.
56. Haga S, Aizawa T, Ishii T, Ikeda K (1996) Complement gene expression in mouse microglia and astrocytes in culture: comparisons with mouse peritoneal macrophages. *Neurosci Lett* 216: 191–4.
57. Watts JC, Drisaldi B, Ng V, Yang J, Strome B, et al. (2007) The CNS glycoprotein Shadoo has PrP(C)-like protective properties and displays reduced levels in prion infections. *Embo J* 26: 4038–50.
58. Chung YH, Joo KM, Nam RH, Lee WB, Lee KH, et al. (2004) Region-specific alterations in insulin-like growth factor-I receptor in the central nervous system of nNOS knockout mice. *Brain Res* 1021: 132–9.
59. D'Costa AP, Lenham JE, Ingram RL, Sonntag WE (1993) Comparison of protein synthesis in brain and peripheral tissue during aging. Relationship to insulin-like growth factor-1 and type 1 IGF receptors. *Ann N Y Acad Sci* 692: 253–5.
60. Kelley KW (2004) From hormones to immunity: the physiology of immunology. *Brain Behav Immun* 18: 95–113.
61. Kelley KW, Weigent DA, Kooijman R (2007) Protein hormones and immunity. *Brain Behav Immun* 21: 384–92.
62. Nakajima S, Ohsawa I, Ohta S, Ohno M, Mikami T (2002) Regular voluntary exercise cures stress-induced impairment of cognitive function and cell proliferation accompanied by increases in cerebral IGF-1 and GST activity in mice. *Behav Brain Res* 211: 178–84.
63. Lanza IR, Nair KS (2010) Mitochondrial function as a determinant of life span. *Pflugers Arch* 459: 277–89.
64. Goldschmidt-Reisin S, Kitakawa M, Herfurth E, Wittmann-Liebold B, Grohmann L, et al. (1998) Mammalian mitochondrial ribosomal proteins. N-terminal amino acid sequencing, characterization, and identification of corresponding gene sequences. *J Biol Chem* 273: 34828–36.
65. Kenmochi N, Suzuki T, Uechi T, Magoori M, Kuniba M, et al. (2001) The human mitochondrial ribosomal protein genes: mapping of 54 genes to the chromosomes and implications for human disorders. *Genomics* 77: 65–70.
66. Griffin EW, Bechara RG, Birch AM, Kelly AM (2009) Exercise enhances hippocampal-dependent learning in the rat: evidence for a BDNF-related mechanism. *Hippocampus* 19: 973–80.
67. Choi SH, Li Y, Parada LF, Sisodia SS (2009) Regulation of hippocampal progenitor cell survival, proliferation and dendritic development by BDNF. *Mol Neurodegener* 4: 52.
68. Jha S, Dutta A (2009) RVB1/RVB2: running rings around molecular biology. *Mol Cell* 34: 521–33.
69. Min W, Cortes U, Herceg Z, Tong WM, Wang ZQ (2010) Deletion of the nuclear isoform of poly(ADP-ribose) glycohydrolase (PARG) reveals its function in DNA repair, genomic stability and tumorigenesis. *Carcinogenesis* 31: 2058–65.
70. Yu J, Zhang L (2008) PUMA, a potent killer with or without p53. *Oncogene* 27 Suppl 1: S71–83.
71. Lee CK, Weindruch R, Prolla TA (2000) Gene-expression profile of the ageing brain in mice. *Nat Genet* 25: 294–7.
